# Supplementary material for: DJ-1 Proteoforms in Breast Cancer Cells: The Escape of Metabolic Epigenetic Misregulation
Source: MDPI journal article supplement (doi:10.3390/cells9091968), 2020-08-26

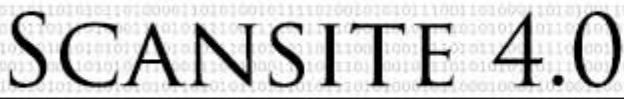

- Home
  - ▢ News
  - FEATURES
    - ▢ Scan Protein for Motifs
    - ▢ Search a Sequence Database for Motifs
    - ▢ Find Sequence Match
    - ▢ Scan Orthologs
  - Predict Localization
  - Calculate Molecular Weight and pI
  - Calculate Amino Acid Composition
  - ▢ Databases and Motifs
  - TUTORIALS
    - ▢ Tutorial Overview
    - ▢ Protein Scan
    - ▢ Database Search
    - ▢ Sequence Match

## Scan for evolutionary conserved phosphorylation sites - Result

## Scan properties

|                                |                                          |
|--------------------------------|------------------------------------------|
| ORTHOLOGY DATABASE             | SwissProt Orthology                      |
| PROTEIN DATABASE               | UniProtKB/Swiss-Prot                     |
| PROTEIN / GENE IDENTIFIER      | PARK7_HUMAN                              |
| SITE PREDICTION STRINGENCY     | Minimum                                  |
| SEQUENCE ALIGNMENT RADIUS      | 40                                       |
| MOTIF GROUP                    | Basophilic serine/threonine kinase group |
| SITE POSITION IN QUERY PROTEIN | 124                                      |

## Scan result properties

|                                                                       |      |
|-----------------------------------------------------------------------|------|
| NUMBER OF ORTHOLOGOUS PROTEINS                                        | 8    |
| NUMBER OF ORTHOLOGOUS PROTEINS WITH<br>CONSERVED PHOSPHORYLATION SITE | 8    |
| EVOLUTIONARY CONSERVATION OF<br>PHOSPHORYLATION SITE                  | 100% |

## Orthologous proteins

Warning: Popup blockers may disable the links in the result table

| ▼ Protein ID                | Protein Annotations                                     | Molecular Weight | Isoelectric Point | Motifs at expected sites                         |
|-----------------------------|---------------------------------------------------------|------------------|-------------------|--------------------------------------------------|
| <a href="#">PARK7_RAT</a>   | RecName: Full=Protein/nucleic acid de (click to expand) | 19976.857        | 6.323             | <a href="#">Akt_Kin</a>                          |
| <a href="#">PARK7_MOUSE</a> | RecName: Full=Protein/nucleic acid de (click to expand) | 20023.990        | 6.320             | <a href="#">Akt_Kin</a>                          |
| <a href="#">PARK7_MESAU</a> | RecName: Full=Protein/nucleic acid de (click to expand) | 19917.729        | 6.326             | <a href="#">Akt_Kin</a>                          |
| <a href="#">PARK7_HUMAN</a> | RecName: Full=Protein/nucleic acid de (click to expand) | 19893.738        | 6.329             | <a href="#">Akt_Kin</a>                          |
| <a href="#">PARK7_DANRE</a> | RecName: Full=Protein/nucleic acid de (click to expand) | 19766.584        | 5.838             | <a href="#">Casn_Kin1_Hrr25_Yck1_Yck2_Yck3</a>   |
| <a href="#">PARK7_CHLAE</a> | RecName: Full=Protein/nucleic acid de (click to expand) | 19907.764        | 6.329             | <a href="#">Akt_Kin</a>                          |
| <a href="#">PARK7_CHICK</a> | RecName: Full=Protein/nucleic acid de (click to expand) | 19945.846        | 6.325             | <a href="#">1433_m1_Akt_Kin_phosphosite-PKCA</a> |
| <a href="#">PARK7_BOVIN</a> | RecName: Full=Protein/nucleic acid de (click to expand) | 20037.995        | 6.841             | <a href="#">Akt_Kin</a>                          |
| Protein ID                  | Protein Annotations                                     | Molecular Weight | Isoelectric Point | Motifs at expected sites                         |

# Sequence alignment

|             |                                                              |                                 |                   |                      |                     |          |          |
|-------------|--------------------------------------------------------------|---------------------------------|-------------------|----------------------|---------------------|----------|----------|
| PARK7_BOVIN | Bos taurus (Bovine)                                          | SAAVKEILKEQEKRRGLIAAICAGPTALLAH | EIFGFSKVTI        | THPLAKDKMMNGSHYSYSEN | NRVEKDG             | LILTSRGP | TSFEF    |
| PARK7_CHICK | Gallus gallus (Chicken)                                      | SAAVKDILKQESRRGLIAAICAGPTALLAH  | GIFGFSKVTI        | THPLAKDKMMNGAHYCYSE  | SRVEKDG             | NILTSRGP | TSFEF    |
| PARK7_CHLAE | Chlorocebus aethiops (Green monkey) (Cercopithecus aethiops) | SAAVKEILKEQENRKG                | LIAAICAGPTALLAH   | EIFGFSKVTI           | THPLAKDKMMNGGHY     | TYSEN    | NRVEKDG  |
| PARK7_DANRE | Danio rerio (Zebrafish) (Brachydanio rerio)                  | SPAVKEVLKQDEGR                  | KGLIAAICAGPTALLAH | GIFGFSKVTI           | THPGAKDKMMAGDHY     | KYSEARVQ | KDGNVIT  |
| PARK7_HUMAN | Homo sapiens (Human)                                         | SAAVKEILKEQENRKG                | LIAAICAGPTALLAH   | EIFGFSKVTI           | THPLAKDKMMNGGHY     | TYSEN    | NRVEKDG  |
| PARK7_MESAU | Mesocricetus auratus (Golden hamster)                        | SPVVKEILKEQESR                  | KGLIAAICAGPTALLAH | EIFGFSKVTI           | THPGAKDKMMNGSHYSYSE | SRVEKDG  | LILTSRGP |
| PARK7_MOUSE | Mus musculus (Mouse)                                         | SPMVKEILKEQESR                  | KGLIAAICAGPTALLAH | EVFGFSKVTI           | THPLAKDKMMNGSHYSYSE | SRVEKDG  | LILTSRGP |
| PARK7_RAT   | Rattus norvegicus (Rat)                                      | SALVKEILKEQENR                  | KGLIAAICAGPTALLAH | EVFGFSKVTI           | THPLAKDKMMNGSHYSYSE | SRVEKDG  | LILTSRGP |

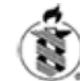

Supplement: s1 [file s1]
