# Supplementary material for: DJ-1 Proteoforms in Breast Cancer Cells: The Escape of Metabolic Epigenetic Misregulation
Source: MDPI journal article supplement (doi:10.3390/cells9091968), 2020-08-26
Supplement: s1 [file s1]

MS/MS SPECTRA

Sequence: ERGGVSLAALKK, R2-MG-H1 (54.01057 Da)  
Charge: +3, Monoisotopic m/z: 428.25430 Da (+0.17 mmu/+0.4 ppm), MH+: 1282.74836 Da,  
RT: 12.35 min,  
Identified with: Sequest HT (v1.3); XCorr:2.72, Ions matched by search engine: 0/0  
Fragment match tolerance used for search: 0.02 Da  
Fragments used for search: a; a-H<sub>2</sub>O; a-NH<sub>3</sub>; b; b-H<sub>2</sub>O; b-NH<sub>3</sub>; y; y-H<sub>2</sub>O; y-NH<sub>3</sub>  
Protein references (1):  
- Histone H1.1 OS=Homo sapiens GN=HIST1H1A PE=1 SV=3 - [H11\_HUMAN]

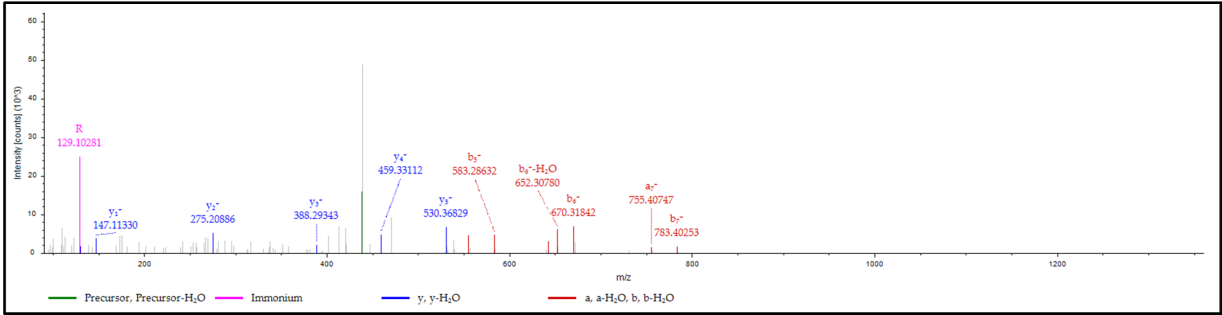

| #1 | Immonium  | a <sup>+</sup> | a <sup>2+</sup> | a <sup>3+</sup> | b <sup>+</sup> | b <sup>2+</sup> | b <sup>3+</sup> | Seq.    | y <sup>+</sup> | y <sup>2+</sup> | y <sup>3+</sup> | #2 |
|----|-----------|----------------|-----------------|-----------------|----------------|-----------------|-----------------|---------|----------------|-----------------|-----------------|----|
| 1  | 102.05496 | 102.05496      | 51.53112        | 34.68984        | 130.04988      | 65.52858        | 44.02148        | E       |                |                 |                 | 12 |
| 2  | 129.11348 | 312.16665      | 156.58696       | 104.72707       | 340.16156      | 170.58442       | 114.05870       | R-MG-H1 | 1183.71580     | 592.36154       | 395.24345       | 11 |
| 3  | 60.04439  | 399.19868      | 200.10298       | 133.73774       | 427.19359      | 214.10043       | 143.06938       | S       | 973.60411      | 487.30569       | 325.20622       | 10 |
| 4  | 30.03383  | 456.22015      | 228.61371       | 152.74490       | 484.21506      | 242.61117       | 162.07654       | G       | 886.57208      | 443.78968       | 296.19554       | 9  |
| 5  | 72.08078  | 555.28857      | 278.14792       | 185.76771       | 583.28348      | 292.14538       | 195.09934       | V       | 829.55061      | 415.27894       | 277.18839       | 8  |
| 6  | 60.04439  | 642.32060      | 321.66394       | 214.77838       | 670.31551      | 335.66139       | 224.11002       | S       | 730.48219      | 365.74473       | 244.16558       | 7  |
| 7  | 86.09643  | 755.40467      | 378.20597       | 252.47307       | 783.39958      | 392.20343       | 261.80471       | L       | 643.45016      | 322.22872       | 215.15490       | 6  |
| 8  | 44.04948  | 826.44179      | 413.72453       | 276.15211       | 854.43670      | 427.72199       | 285.48375       | A       | 530.36609      | 265.68668       | 177.46021       | 5  |
| 9  | 44.04948  | 897.47891      | 449.24309       | 299.83115       | 925.47382      | 463.24055       | 309.16279       | A       | 459.32897      | 230.16812       | 153.78117       | 4  |
| 10 | 86.09643  | 1010.56298     | 505.78513       | 337.52584       | 1038.55789     | 519.78258       | 346.85748       | L       | 388.29185      | 194.64956       | 130.10213       | 3  |
| 11 | 101.10733 | 1138.65795     | 569.83261       | 380.22417       | 1166.65286     | 583.83007       | 389.55580       | K       | 275.20778      | 138.10753       | 92.40744        | 2  |
| 12 |           |                |                 |                 |                |                 |                 | K       | 147.11281      | 74.06004        | 49.70912        | 1  |

Sequence: ERGGVSLAALK, R2-MG-H1 (54.01057 Da)

Charge: +2, Monoisotopic m/z: 577.83276 Da (+2.69 mmu/+4.66 ppm), MH+: 1154.65825 Da, RT: 14.85 min,

Identified with: Sequest HT (v1.3); XCorr:2.54, Ions matched by search engine: 0/0

Fragment match tolerance used for search: 0.02 Da

Fragments used for search: a; a-H<sub>2</sub>O; a-NH<sub>3</sub>; b; b-H<sub>2</sub>O; b-NH<sub>3</sub>; y; y-H<sub>2</sub>O; y-NH<sub>3</sub>

Protein references (1):

Histone H1.1 OS=Homo sapiens GN=HIST1H1A PE=1 SV=3 - [H11\_HUMAN]

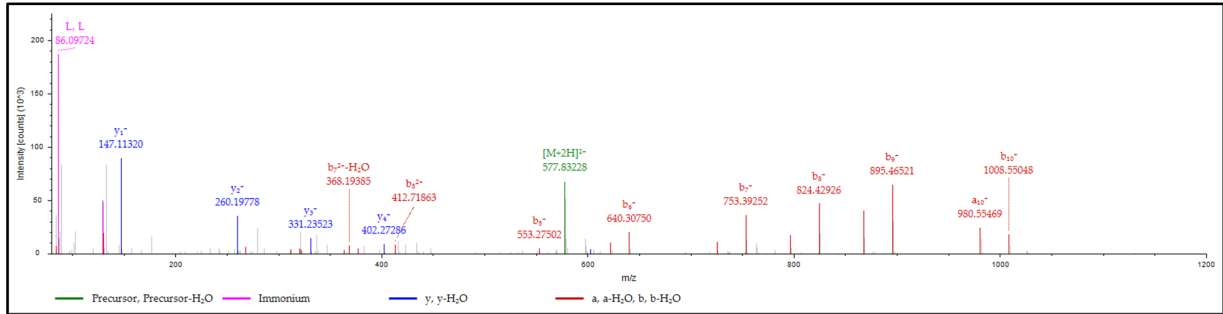

| #1 | Immonium  | a <sup>+</sup> | a <sup>2+</sup> | b <sup>+</sup> | b <sup>2+</sup> | Seq.    | y <sup>+</sup> | y <sup>2+</sup> | #2 |
|----|-----------|----------------|-----------------|----------------|-----------------|---------|----------------|-----------------|----|
| 1  | 102.05496 | 102.05496      | 51.53112        | 130.04988      | 65.52858        | E       |                |                 | 11 |
| 2  | 129.11348 | 312.16665      | 156.58696       | 340.16156      | 170.58442       | R-MG-H1 | 1025.61027     | 513.30877       | 10 |
| 3  | 30.03383  | 369.18812      | 185.09770       | 397.18303      | 199.09515       | G       | 815.49858      | 408.25293       | 9  |
| 4  | 30.03383  | 426.20959      | 213.60843       | 454.20450      | 227.60589       | G       | 758.47711      | 379.74219       | 8  |
| 5  | 72.08078  | 525.27801      | 263.14264       | 553.27292      | 277.14010       | V       | 701.45564      | 351.23146       | 7  |
| 6  | 60.04439  | 612.31004      | 306.65866       | 640.30495      | 320.65611       | S       | 602.38722      | 301.69725       | 6  |
| 7  | 86.09643  | 725.39411      | 363.20069       | 753.38902      | 377.19815       | L       | 515.35519      | 258.18123       | 5  |
| 8  | 44.04948  | 796.43123      | 398.71925       | 824.42614      | 412.71671       | A       | 402.27112      | 201.63920       | 4  |
| 9  | 44.04948  | 867.46835      | 434.23781       | 895.46326      | 448.23527       | A       | 331.23400      | 166.12064       | 3  |
| 10 | 86.09643  | 980.55242      | 490.77985       | 1008.54733     | 504.77730       | L       | 260.19688      | 130.60208       | 2  |
| 11 |           |                |                 |                |                 | K       | 147.11281      | 74.06004        | 1  |

Sequence: AGLQFPVGR, R9-MG-H1 (54.01057 Da)

Charge: +2, Monoisotopic m/z: 499.77615 Da (+1.59 mmu/+3.19 ppm), MH+: 998.54503 Da, RT: 14.70 min,

Identified with: Sequest HT (v1.3); XCorr:2.08, Ions matched by search engine: 0/0

Fragment match tolerance used for search: 0.02 Da

Fragments used for search: a; a-NH<sub>3</sub>; b; b-NH<sub>3</sub>; y; y-NH<sub>3</sub>

Protein references (15):

- Histone H2A type 1-A OS=Homo sapiens GN=HIST1H2AA PE=1 SV=3 - [H2A1A\_HUMAN]
- Histone H2A type 1-B/E OS=Homo sapiens GN=HIST1H2AB PE=1 SV=2 - [H2A1B\_HUMAN]
- Histone H2A type 1-C OS=Homo sapiens GN=HIST1H2AC PE=1 SV=3 - [H2A1C\_HUMAN]
- Histone H2A type 1-D OS=Homo sapiens GN=HIST1H2AD PE=1 SV=2 - [H2A1D\_HUMAN]
- Histone H2A type 1-H OS=Homo sapiens GN=HIST1H2AH PE=1 SV=3 - [H2A1H\_HUMAN]
- Histone H2A type 1-J OS=Homo sapiens GN=HIST1H2AJ PE=1 SV=3 - [H2A1J\_HUMAN]
- Histone H2A type 1 OS=Homo sapiens GN=HIST1H2AG PE=1 SV=2 - [H2A1\_HUMAN]
- Histone H2A type 2-A OS=Homo sapiens GN=HIST2H2AA3 PE=1 SV=3 - [H2A2A\_HUMAN]
- Histone H2A type 2-B OS=Homo sapiens GN=HIST2H2AB PE=1 SV=3 - [H2A2B\_HUMAN]
- Histone H2A type 2-C OS=Homo sapiens GN=HIST2H2AC PE=1 SV=4 - [H2A2C\_HUMAN]
- Histone H2A type 3 OS=Homo sapiens GN=HIST3H2A PE=1 SV=3 - [H2A3\_HUMAN]
- Histone H2A.J OS=Homo sapiens GN=H2AFJ PE=1 SV=1 - [H2AJ\_HUMAN]
- Histone H2A.V OS=Homo sapiens GN=H2AFV PE=1 SV=3 - [H2AV\_HUMAN]
- Histone H2AX OS=Homo sapiens GN=H2AFX PE=1 SV=2 - [H2AX\_HUMAN]

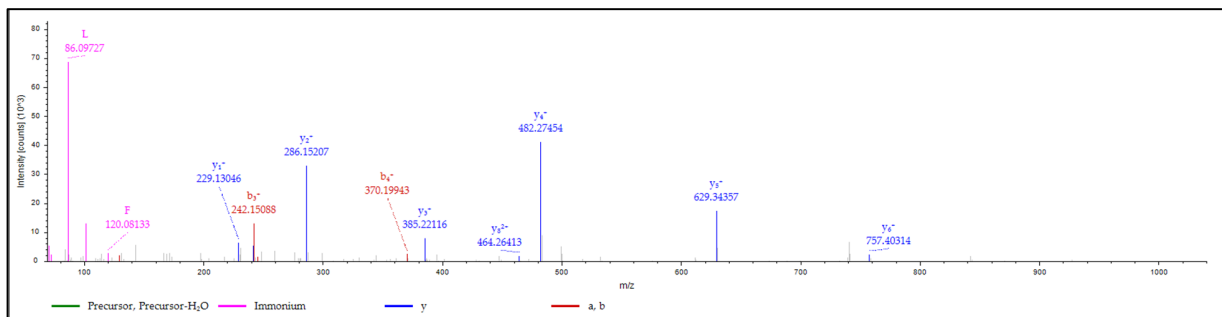

| #1 | Immonium  | a <sup>+</sup> | a <sup>2+</sup> | b <sup>+</sup> | b <sup>2+</sup> | Seq.    | y <sup>+</sup> | y <sup>2+</sup> | #2 |
|----|-----------|----------------|-----------------|----------------|-----------------|---------|----------------|-----------------|----|
| 1  | 44.04948  | 44.04948       | 22.52838        | 72.04440       | 36.52584        | A       |                |                 | 9  |
| 2  | 30.03383  | 101.07095      | 51.03911        | 129.06587      | 65.03657        | G       | 927.50473      | 464.25600       | 8  |
| 3  | 86.09643  | 214.15502      | 107.58115       | 242.14994      | 121.57861       | L       | 870.48326      | 435.74527       | 7  |
| 4  | 101.07094 | 342.21360      | 171.61044       | 370.20852      | 185.60790       | Q       | 757.39919      | 379.20323       | 6  |
| 5  | 120.08078 | 489.28202      | 245.14465       | 517.27694      | 259.14211       | F       | 629.34061      | 315.17394       | 5  |
| 6  | 70.06513  | 586.33479      | 293.67103       | 614.32971      | 307.66849       | P       | 482.27219      | 241.63973       | 4  |
| 7  | 72.08078  | 685.40321      | 343.20524       | 713.39813      | 357.20270       | V       | 385.21942      | 193.11335       | 3  |
| 8  | 30.03383  | 742.42468      | 371.71598       | 770.41960      | 385.71344       | G       | 286.15100      | 143.57914       | 2  |
| 9  |           |                |                 |                |                 | R-MG-H1 | 229.12953      | 115.06840       | 1  |

Sequence: HLQLAIR, R7-MG-H1 (54.01057 Da)

Charge: +2, Monoisotopic m/z: 452.77289 Da (+1.08 mmu/+2.38 ppm), MH+: 904.53850 Da, RT: 11.45 min,

Identified with: Sequest HT (v1.3); XCorr:2.18, Ions matched by search engine: 0/0

Fragment match tolerance used for search: 0.02 Da

Fragments used for search: a; a-NH<sub>3</sub>; b; b-NH<sub>3</sub>; y; y-NH<sub>3</sub>

Protein references (14):

- Histone H2A type 1-A OS=Homo sapiens GN=HIST1H2AA PE=1 SV=3 - [H2A1A\_HUMAN]
- Histone H2A type 1-B/E OS=Homo sapiens GN=HIST1H2AB PE=1 SV=2 - [H2A1B\_HUMAN]
- Histone H2A type 1-C OS=Homo sapiens GN=HIST1H2AC PE=1 SV=3 - [H2A1C\_HUMAN]
- Histone H2A type 1-D OS=Homo sapiens GN=HIST1H2AD PE=1 SV=2 - [H2A1D\_HUMAN]
- Histone H2A type 1-H OS=Homo sapiens GN=HIST1H2AH PE=1 SV=3 - [H2A1H\_HUMAN]
- Histone H2A type 1-J OS=Homo sapiens GN=HIST1H2AJ PE=1 SV=3 - [H2A1J\_HUMAN]
- Histone H2A type 1 OS=Homo sapiens GN=HIST1H2AG PE=1 SV=2 - [H2A1\_HUMAN]
- Histone H2A type 2-A OS=Homo sapiens GN=HIST2H2AA3 PE=1 SV=3 - [H2A2A\_HUMAN]
- Histone H2A type 2-C OS=Homo sapiens GN=HIST2H2AC PE=1 SV=4 - [H2A2C\_HUMAN]
- Histone H2A type 3 OS=Homo sapiens GN=HIST3H2A PE=1 SV=3 - [H2A3\_HUMAN]
- Histone H2A.J OS=Homo sapiens GN=H2AFJ PE=1 SV=1 - [H2AJ\_HUMAN]
- Histone H2A.V OS=Homo sapiens GN=H2AFV PE=1 SV=3 - [H2AV\_HUMAN]
- Histone H2AX OS=Homo sapiens GN=H2AFX PE=1 SV=2 - [H2AX\_HUMAN]
- Histone H2A.Z OS=Homo sapiens GN=H2AFZ PE=1 SV=2 - [H2AZ\_HUMAN]

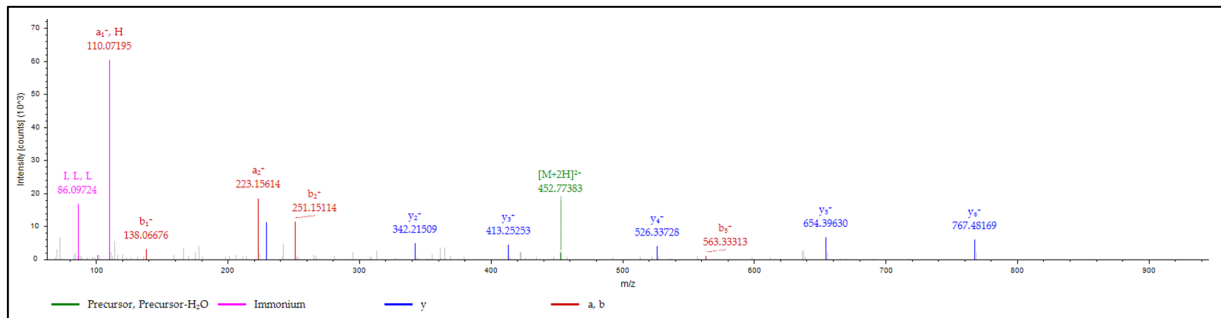

| #1 | Immonium  | a <sup>+</sup> | a <sup>2+</sup> | b <sup>+</sup> | b <sup>2+</sup> | Seq.    | y <sup>+</sup> | y <sup>2+</sup> | #2 |
|----|-----------|----------------|-----------------|----------------|-----------------|---------|----------------|-----------------|----|
| 1  | 110.07127 | 110.07127      | 55.53927        | 138.06619      | 69.53673        | H       |                |                 | 7  |
| 2  | 86.09643  | 223.15534      | 112.08131       | 251.15026      | 126.07877       | L       | 767.47744      | 384.24236       | 6  |
| 3  | 101.07094 | 351.21392      | 176.11060       | 379.20884      | 190.10806       | Q       | 654.39337      | 327.70032       | 5  |
| 4  | 86.09643  | 464.29799      | 232.65263       | 492.29291      | 246.65009       | L       | 526.33479      | 263.67103       | 4  |
| 5  | 44.04948  | 535.33511      | 268.17119       | 563.33003      | 282.16865       | A       | 413.25072      | 207.12900       | 3  |
| 6  | 86.09643  | 648.41918      | 324.71323       | 676.41410      | 338.71069       | I       | 342.21360      | 171.61044       | 2  |
| 7  |           |                |                 |                |                 | R-MG-H1 | 229.12953      | 115.06840       | 1  |

Sequence: RSTITSR, R1-MG-H1 (54.01057 Da)

Charge: +2, Monoisotopic m/z: 437.74393 Da (+3.22 mmu/+7.37 ppm), MH+: 874.48058 Da, RT: 4.35 min,

Identified with: Sequest HT (v1.3); XCorr:2.49, Ions matched by search engine: 0/0

Fragment match tolerance used for search: 0.02 Da

Fragments used for search: a; a-H<sub>2</sub>O; a-NH<sub>3</sub>; b; b-H<sub>2</sub>O; b-NH<sub>3</sub>; y; y-H<sub>2</sub>O; y-NH<sub>3</sub>

Protein references (16):

- Histone H2B type 1-B OS=Homo sapiens GN=HIST1H2BB PE=1 SV=2 - [H2B1B\_HUMAN]
- Histone H2B type 1-C/E/F/G/I OS=Homo sapiens GN=HIST1H2BC PE=1 SV=4 - [H2B1C\_HUMAN]
- Histone H2B type 1-D OS=Homo sapiens GN=HIST1H2BD PE=1 SV=2 - [H2B1D\_HUMAN]
- Histone H2B type 1-H OS=Homo sapiens GN=HIST1H2BH PE=1 SV=3 - [H2B1H\_HUMAN]
- Histone H2B type 1-J OS=Homo sapiens GN=HIST1H2BJ PE=1 SV=3 - [H2B1J\_HUMAN]
- Histone H2B type 1-K OS=Homo sapiens GN=HIST1H2BK PE=1 SV=3 - [H2B1K\_HUMAN]
- Histone H2B type 1-L OS=Homo sapiens GN=HIST1H2BL PE=1 SV=3 - [H2B1L\_HUMAN]
- Histone H2B type 1-M OS=Homo sapiens GN=HIST1H2BM PE=1 SV=3 - [H2B1M\_HUMAN]
- Histone H2B type 1-N OS=Homo sapiens GN=HIST1H2BN PE=1 SV=3 - [H2B1N\_HUMAN]
- Histone H2B type 1-O OS=Homo sapiens GN=HIST1H2BO PE=1 SV=3 - [H2B1O\_HUMAN]
- Histone H2B type 2-F OS=Homo sapiens GN=HIST2H2BF PE=1 SV=3 - [H2B2F\_HUMAN]

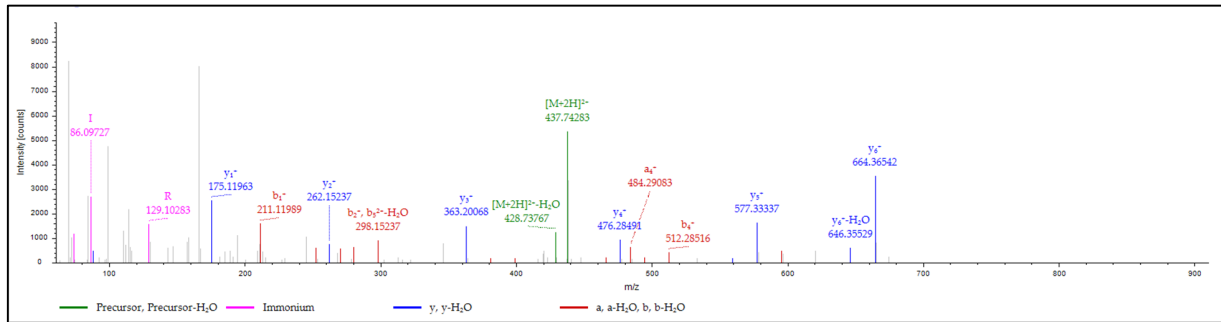

| #1 | Immonium  | a <sup>+</sup> | a <sup>2+</sup> | b <sup>+</sup> | b <sup>2+</sup> | Seq.    | y <sup>+</sup> | y <sup>2+</sup> | #2 |
|----|-----------|----------------|-----------------|----------------|-----------------|---------|----------------|-----------------|----|
| 1  | 129.11348 | 183.12405      | 92.06566        | 211.11896      | 106.06312       | R-MG-H1 |                |                 | 7  |
| 2  | 60.04439  | 270.15608      | 135.58168       | 298.15099      | 149.57913       | S       | 664.36245      | 332.68486       | 6  |
| 3  | 74.06004  | 371.20376      | 186.10552       | 399.19867      | 200.10297       | T       | 577.33042      | 289.16885       | 5  |
| 4  | 86.09643  | 484.28783      | 242.64755       | 512.28274      | 256.64501       | I       | 476.28274      | 238.64501       | 4  |
| 5  | 74.06004  | 585.33551      | 293.17139       | 613.33042      | 307.16885       | T       | 363.19867      | 182.10297       | 3  |
| 6  | 60.04439  | 672.36754      | 336.68741       | 700.36245      | 350.68486       | S       | 262.15099      | 131.57913       | 2  |
| 7  |           |                |                 |                |                 | R       | 175.11896      | 88.06312        | 1  |

Sequence: YRPGTVALR, R2-MG-H1 (54.01057 Da)

Charge: +3, Monoisotopic m/z: 362.87457 Da (+1.23 mmu/+3.38 ppm), MH+: 1086.60917 Da, RT: 9.05 min,

Identified with: Sequest HT (v1.3); XCorr:2.34, Ions matched by search engine: 0/0

Fragment match tolerance used for search: 0.02 Da

Fragments used for search: a; a-H<sub>2</sub>O; a-NH<sub>3</sub>; b; b-H<sub>2</sub>O; b-NH<sub>3</sub>; y; y-H<sub>2</sub>O; y-NH<sub>3</sub>

Protein references (5):

- Histone H3.1t OS=Homo sapiens GN=HIST3H3 PE=1 SV=3 - [H31T\_HUMAN]
- Histone H3.1 OS=Homo sapiens GN=HIST1H3A PE=1 SV=2 - [H31\_HUMAN]
- Histone H3.2 OS=Homo sapiens GN=HIST2H3A PE=1 SV=3 - [H32\_HUMAN]
- Histone H3.3 OS=Homo sapiens GN=H3F3A PE=1 SV=2 - [H33\_HUMAN]
- Histone H3.3C OS=Homo sapiens GN=H3F3C PE=1 SV=3 - [H3C\_HUMAN]

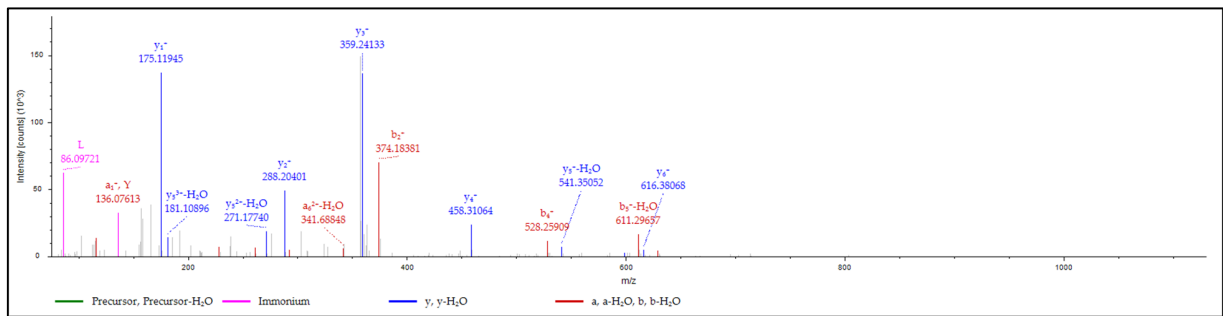

| #1 | Immonium  | a <sup>+</sup> | a <sup>2+</sup> | a <sup>3+</sup> | b <sup>+</sup> | b <sup>2+</sup> | b <sup>3+</sup> | Seq.    | y <sup>+</sup> | y <sup>2+</sup> | y <sup>3+</sup> | #2 |
|----|-----------|----------------|-----------------|-----------------|----------------|-----------------|-----------------|---------|----------------|-----------------|-----------------|----|
| 1  | 136.07568 | 136.07568      | 68.54148        | 46.03008        | 164.07060      | 82.53894        | 55.36172        | Y       |                |                 |                 | 9  |
| 2  | 129.11348 | 346.18737      | 173.59732       | 116.06731       | 374.18228      | 187.59478       | 125.39894       | R-MG-H1 | 923.54218      | 462.27473       | 308.51891       | 8  |
| 3  | 70.06513  | 443.24014      | 222.12371       | 148.41823       | 471.23505      | 236.12116       | 157.74987       | P       | 713.43049      | 357.21888       | 238.48168       | 7  |
| 4  | 30.03383  | 500.26161      | 250.63444       | 167.42539       | 528.25652      | 264.63190       | 176.75702       | G       | 616.37772      | 308.69250       | 206.13076       | 6  |
| 5  | 74.06004  | 601.30929      | 301.15828       | 201.10795       | 629.30420      | 315.15574       | 210.43958       | T       | 559.35625      | 280.18176       | 187.12360       | 5  |
| 6  | 72.08078  | 700.37771      | 350.69249       | 234.13075       | 728.37262      | 364.68995       | 243.46239       | V       | 458.30857      | 229.65792       | 153.44104       | 4  |
| 7  | 44.04948  | 771.41483      | 386.21105       | 257.80979       | 799.40974      | 400.20851       | 267.14143       | A       | 359.24015      | 180.12371       | 120.41823       | 3  |
| 8  | 86.09643  | 884.49890      | 442.75309       | 295.50448       | 912.49381      | 456.75054       | 304.83612       | L       | 288.20303      | 144.60515       | 96.73919        | 2  |
| 9  |           |                |                 |                 |                |                 |                 | R       | 175.11896      | 88.06312        | 59.04450        | 1  |

Sequence: RVTIMPK, R1-MG-H1 (54.01057 Da), M5-Oxidation (15.99492 Da)  
Charge: +2, Monoisotopic m/z: 457.76285 Da (+2.79 mmu/+6.09 ppm), MH+: 914.51842 Da, RT: 6.07 min,  
Identified with: Sequest HT (v1.3); XCorr:2.15, Ions matched by search engine: 0/0  
Fragment match tolerance used for search: 0.02 Da  
Fragments used for search: a; a-H<sub>2</sub>O; a-NH<sub>3</sub>; b; b-H<sub>2</sub>O; b-NH<sub>3</sub>; y; y-H<sub>2</sub>O; y-NH<sub>3</sub>  
Protein references (5):

- Histone H3.1t OS=Homo sapiens GN=HIST3H3 PE=1 SV=3 - [H31T\_HUMAN]
- Histone H3.1 OS=Homo sapiens GN=HIST1H3A PE=1 SV=2 - [H31\_HUMAN]
- Histone H3.2 OS=Homo sapiens GN=HIST2H3A PE=1 SV=3 - [H32\_HUMAN]
- Histone H3.3 OS=Homo sapiens GN=H3F3A PE=1 SV=2 - [H33\_HUMAN]
- Histone H3.3C OS=Homo sapiens GN=H3F3C PE=1 SV=3 - [H3C\_HUMAN]

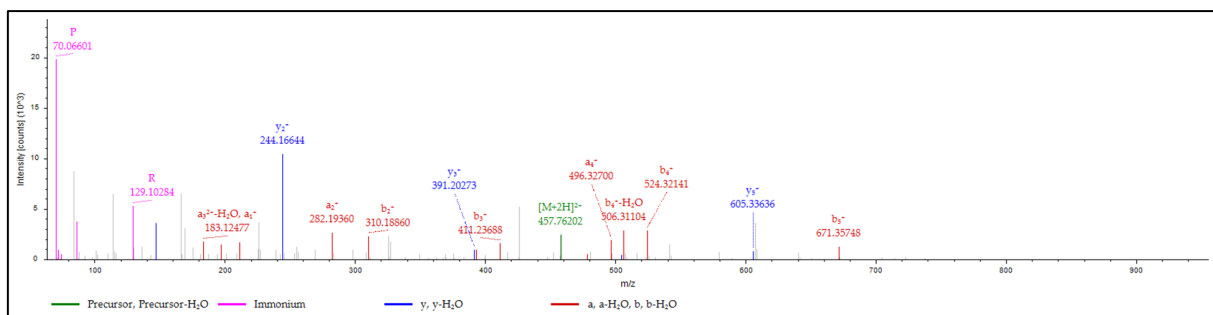

| #1 | Immonium  | a <sup>+</sup> | a <sup>2+</sup> | b <sup>+</sup> | b <sup>2+</sup> | Seq.        | y <sup>+</sup> | y <sup>2+</sup> | #2 |
|----|-----------|----------------|-----------------|----------------|-----------------|-------------|----------------|-----------------|----|
| 1  | 129.11348 | 183.12405      | 92.06566        | 211.11896      | 106.06312       | R-MG-H1     |                |                 | 7  |
| 2  | 72.08078  | 282.19247      | 141.59987       | 310.18738      | 155.59733       | V           | 704.40117      | 352.70422       | 6  |
| 3  | 74.06004  | 383.24015      | 192.12371       | 411.23506      | 206.12117       | T           | 605.33275      | 303.17001       | 5  |
| 4  | 86.09643  | 496.32422      | 248.66575       | 524.31913      | 262.66320       | I           | 504.28507      | 252.64617       | 4  |
| 5  | 104.05286 | 643.35963      | 322.18345       | 671.35455      | 336.18091       | M-Oxidation | 391.20100      | 196.10414       | 3  |
| 6  | 70.06513  | 740.41240      | 370.70984       | 768.40732      | 384.70730       | P           | 244.16558      | 122.58643       | 2  |
| 7  |           |                |                 |                |                 | K           | 147.11281      | 74.06004        | 1  |

Sequence: YRPGTVALR, R2-MG-H1 (54.01057 Da)

Charge: +3, Monoisotopic m/z: 362.87558 Da (+2.23 mmu/+6.16 ppm), MH+: 1086.61219 Da, RT: 8.87 min,

Identified with: Sequest HT (v1.3); XCorr:2.38, Ions matched by search engine: 0/0

Fragment match tolerance used for search: 0.02 Da

Fragments used for search: a; a-H<sub>2</sub>O; a-NH<sub>3</sub>; b; b-H<sub>2</sub>O; b-NH<sub>3</sub>; y; y-H<sub>2</sub>O; y-NH<sub>3</sub>

Protein references (5):

- Histone H3.1t OS=Homo sapiens GN=HIST3H3 PE=1 SV=3 - [H31T\_HUMAN]
- Histone H3.1 OS=Homo sapiens GN=HIST1H3A PE=1 SV=2 - [H31\_HUMAN]
- Histone H3.2 OS=Homo sapiens GN=HIST2H3A PE=1 SV=3 - [H32\_HUMAN]
- Histone H3.3 OS=Homo sapiens GN=H3F3A PE=1 SV=2 - [H33\_HUMAN]
- Histone H3.3C OS=Homo sapiens GN=H3F3C PE=1 SV=3 - [H3C\_HUMAN]

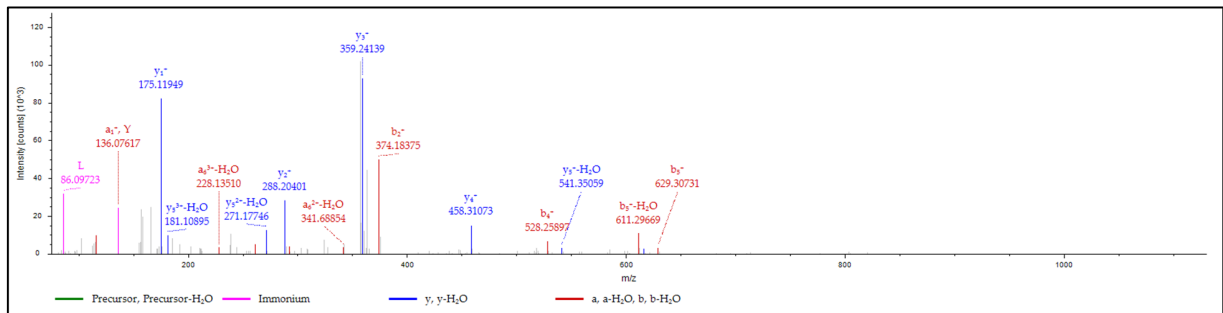

| #1 | Immonium  | a <sup>+</sup> | a <sup>2+</sup> | a <sup>3+</sup> | b <sup>+</sup> | b <sup>2+</sup> | b <sup>3+</sup> | Seq.    | y <sup>+</sup> | y <sup>2+</sup> | y <sup>3+</sup> | #2 |
|----|-----------|----------------|-----------------|-----------------|----------------|-----------------|-----------------|---------|----------------|-----------------|-----------------|----|
| 1  | 136.07568 | 136.07568      | 68.54148        | 46.03008        | 164.07060      | 82.53894        | 55.36172        | Y       |                |                 |                 | 9  |
| 2  | 129.11348 | 346.18737      | 173.59732       | 116.06731       | 374.18228      | 187.59478       | 125.39894       | R-MG-H1 | 923.54218      | 462.27473       | 308.51891       | 8  |
| 3  | 70.06513  | 443.24014      | 222.12371       | 148.41823       | 471.23505      | 236.12116       | 157.74987       | P       | 713.43049      | 357.21888       | 238.48168       | 7  |
| 4  | 30.03383  | 500.26161      | 250.63444       | 167.42539       | 528.25652      | 264.63190       | 176.75702       | G       | 616.37772      | 308.69250       | 206.13076       | 6  |
| 5  | 74.06004  | 601.30929      | 301.15828       | 201.10795       | 629.30420      | 315.15574       | 210.43958       | T       | 559.35625      | 280.18176       | 187.12360       | 5  |
| 6  | 72.08078  | 700.37771      | 350.69249       | 234.13075       | 728.37262      | 364.68995       | 243.46239       | V       | 458.30857      | 229.65792       | 153.44104       | 4  |
| 7  | 44.04948  | 771.41483      | 386.21105       | 257.80979       | 799.40974      | 400.20851       | 267.14143       | A       | 359.24015      | 180.12371       | 120.41823       | 3  |
| 8  | 86.09643  | 884.49890      | 442.75309       | 295.50448       | 912.49381      | 456.75054       | 304.83612       | L       | 288.20303      | 144.60515       | 96.73919        | 2  |
| 9  |           |                |                 |                 |                |                 |                 | R       | 175.11896      | 88.06312        | 59.04450        | 1  |



Sequence: ERGGVSLAALKK, R2-MG-H1 (54.01057 Da)  
Charge: +2, Monoisotopic m/z: 641.88165 Da (+4.1 mmu/+6.39 ppm), MH+: 1282.75603 Da, RT: 12.49 min,  
Identified with: Sequest HT (v1.3); XCorr:2.04, Ions matched by search engine: 0/0  
Fragment match tolerance used for search: 0.02 Da  
Fragments used for search: a; a-H<sub>2</sub>O; a-NH<sub>3</sub>; b; b-H<sub>2</sub>O; b-NH<sub>3</sub>; y; y-H<sub>2</sub>O; y-NH<sub>3</sub>  
Protein references (1):  
- Histone H1.1 OS=Homo sapiens GN=HIST1H1A PE=1 SV=3 - [H11\_HUMAN]

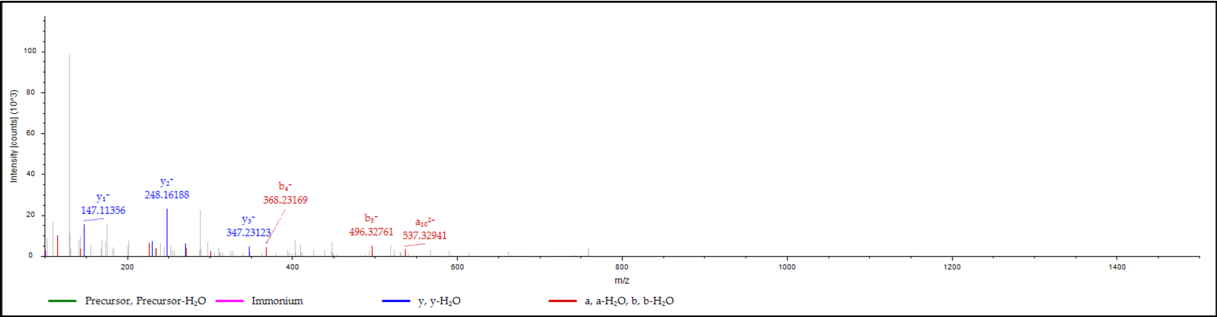

| #1 | Immonium  | a <sup>+</sup> | a <sup>2+</sup> | a <sup>3+</sup> | a <sup>4+</sup> | b <sup>+</sup> | b <sup>2+</sup> | b <sup>3+</sup> | b <sup>4+</sup> | Seq.    | y <sup>+</sup> | y <sup>2+</sup> | y <sup>3+</sup> | y <sup>4+</sup> | #2 |
|----|-----------|----------------|-----------------|-----------------|-----------------|----------------|-----------------|-----------------|-----------------|---------|----------------|-----------------|-----------------|-----------------|----|
| 1  | 44.04948  | 44.04948       | 22.52838        | 15.35468        | 11.76783        | 72.04440       | 36.52584        | 24.68632        | 18.76656        | A       |                |                 |                 |                 | 13 |
| 2  | 44.04948  | 115.08660      | 58.04694        | 39.03372        | 29.52711        | 143.08152      | 72.04440        | 48.36536        | 36.52584        | A       | 1376.82608     | 688.91668       | 459.61354       | 344.96198       | 12 |
| 3  | 101.10733 | 243.18157      | 122.09442       | 81.73204        | 61.55085        | 271.17649      | 136.09188       | 91.06368        | 68.54958        | K       | 1305.78896     | 653.39812       | 435.93450       | 327.20270       | 11 |
| 4  | 70.06513  | 340.23434      | 170.62081       | 114.08297       | 85.81404        | 368.22926      | 184.61827       | 123.41460       | 92.81277        | P       | 1177.69399     | 589.35063       | 393.23618       | 295.17896       | 10 |
| 5  | 101.10733 | 468.32931      | 234.66829       | 156.78129       | 117.83779       | 496.32423      | 248.66575       | 166.11293       | 124.83651       | K       | 1080.64122     | 540.82425       | 360.88526       | 270.91576       | 9  |
| 6  | 60.04439  | 555.36134      | 278.18431       | 185.79197       | 139.59579       | 583.35626      | 292.18177       | 195.12360       | 146.59452       | S       | 952.54625      | 476.77676       | 318.18693       | 238.89202       | 8  |
| 7  | 30.03383  | 612.38281      | 306.69504       | 204.79912       | 153.85116       | 640.37773      | 320.69250       | 214.13076       | 160.84989       | G       | 865.51422      | 433.26075       | 289.17626       | 217.13401       | 7  |
| 8  | 101.10733 | 794.48835      | 397.74781       | 265.50097       | 199.37754       | 822.48326      | 411.74527       | 274.83260       | 206.37627       | K-MG-H1 | 808.49275      | 404.75001       | 270.16910       | 202.87865       | 6  |
| 9  | 70.06513  | 891.54112      | 446.27420       | 297.85189       | 223.64074       | 919.53603      | 460.27165       | 307.18353       | 230.63947       | P       | 626.38722      | 313.69725       | 209.46726       | 157.35226       | 5  |
| 10 | 101.10733 | 1073.64665     | 537.32696       | 358.55374       | 269.16712       | 1101.64157     | 551.32442       | 367.88537       | 276.16585       | K-MG-H1 | 529.33445      | 265.17086       | 177.11633       | 133.08907       | 4  |
| 11 | 72.08078  | 1172.71507     | 586.86117       | 391.57654       | 293.93423       | 1200.70999     | 600.85863       | 400.90818       | 300.93295       | V       | 347.22891      | 174.11809       | 116.41449       | 87.56269        | 3  |
| 12 | 74.06004  | 1273.76275     | 637.38501       | 425.25910       | 319.19615       | 1301.75767     | 651.38247       | 434.59074       | 326.19487       | T       | 248.16049      | 124.58388       | 83.39168        | 62.79558        | 2  |
| 13 |           |                |                 |                 |                 |                |                 |                 |                 | K       | 147.11281      | 74.06004        | 49.70912        | 37.53366        | 1  |

Sequence: RVTIMPK, R1-MG-H1 (54.01057 Da), M5-Oxidation (15.99492 Da)  
Charge: +2, Monoisotopic m/z: 457.76334 Da (+3.28 mmu/+7.16 ppm), MH+: 914.51940 Da, RT: 5.68 min,  
Identified with: Sequest HT (v1.3); XCorr:2.06, Ions matched by search engine: 0/0  
Fragment match tolerance used for search: 0.02 Da  
Fragments used for search: a; a-H<sub>2</sub>O; a-NH<sub>3</sub>; b; b-H<sub>2</sub>O; b-NH<sub>3</sub>; y; y-H<sub>2</sub>O; y-NH<sub>3</sub>  
Protein references (5):  
- Histone H3.1t OS=Homo sapiens GN=HIST3H3 PE=1 SV=3 - [H31T\_HUMAN]  
- Histone H3.1 OS=Homo sapiens GN=HIST1H3A PE=1 SV=2 - [H31\_HUMAN]  
- Histone H3.2 OS=Homo sapiens GN=HIST2H3A PE=1 SV=3 - [H32\_HUMAN]  
- Histone H3.3 OS=Homo sapiens GN=H3F3A PE=1 SV=2 - [H33\_HUMAN]  
- Histone H3.3C OS=Homo sapiens GN=H3F3C PE=1 SV=3 - [H3C\_HUMAN]

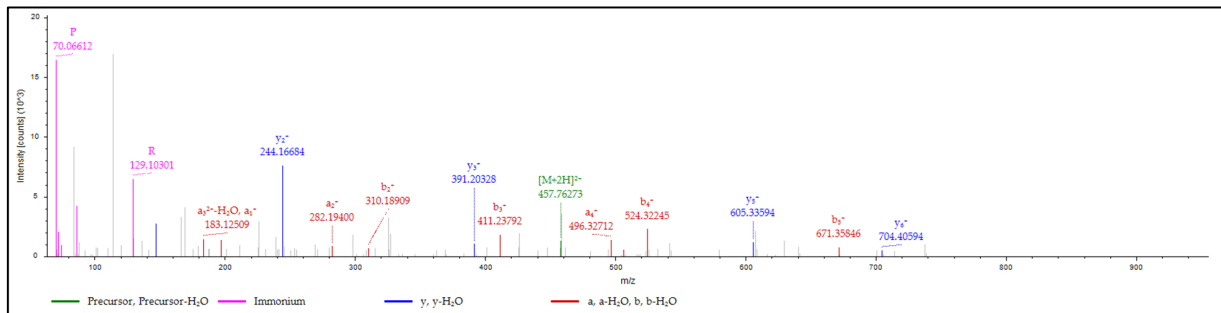

| #1 | Immonium  | a <sup>+</sup> | a <sup>2+</sup> | b <sup>+</sup> | b <sup>2+</sup> | Seq.        | y <sup>+</sup> | y <sup>2+</sup> | #2 |
|----|-----------|----------------|-----------------|----------------|-----------------|-------------|----------------|-----------------|----|
| 1  | 129.11348 | 183.12405      | 92.06566        | 211.11896      | 106.06312       | R-MG-H1     |                |                 | 7  |
| 2  | 72.08078  | 282.19247      | 141.59987       | 310.18738      | 155.59733       | V           | 704.40117      | 352.70422       | 6  |
| 3  | 74.06004  | 383.24015      | 192.12371       | 411.23506      | 206.12117       | T           | 605.33275      | 303.17001       | 5  |
| 4  | 86.09643  | 496.32422      | 248.66575       | 524.31913      | 262.66320       | I           | 504.28507      | 252.64617       | 4  |
| 5  | 104.05286 | 643.35963      | 322.18345       | 671.35455      | 336.18091       | M-Oxidation | 391.20100      | 196.10414       | 3  |
| 6  | 70.06513  | 740.41240      | 370.70984       | 768.40732      | 384.70730       | P           | 244.16558      | 122.58643       | 2  |
| 7  |           |                |                 |                |                 | K           | 147.11281      | 74.06004        | 1  |

Sequence: AGLQFPVGR, R9-MG-H1 (54.01057 Da)

Charge: +2, Monoisotopic m/z: 499.77774 Da (+3.18 mmu/+6.37 ppm), MH+: 998.54820 Da, RT: 14.46 min,

Identified with: Sequest HT (v1.3); XCorr:2.28, Ions matched by search engine: 0/0

Fragment match tolerance used for search: 0.02 Da

Fragments used for search: a; a-NH<sub>3</sub>; b; b-NH<sub>3</sub>; y; y-NH<sub>3</sub>

Protein references (15):

- Histone H2A type 1-A OS=Homo sapiens GN=HIST1H2AA PE=1 SV=3 - [H2A1A\_HUMAN]
- Histone H2A type 1-B/E OS=Homo sapiens GN=HIST1H2AB PE=1 SV=2 - [H2A1B\_HUMAN]
- Histone H2A type 1-C OS=Homo sapiens GN=HIST1H2AC PE=1 SV=3 - [H2A1C\_HUMAN]
- Histone H2A type 1-D OS=Homo sapiens GN=HIST1H2AD PE=1 SV=2 - [H2A1D\_HUMAN]
- Histone H2A type 1-H OS=Homo sapiens GN=HIST1H2AH PE=1 SV=3 - [H2A1H\_HUMAN]
- Histone H2A type 1-J OS=Homo sapiens GN=HIST1H2AJ PE=1 SV=3 - [H2A1J\_HUMAN]
- Histone H2A type 1 OS=Homo sapiens GN=HIST1H2AG PE=1 SV=2 - [H2A1\_HUMAN]
- Histone H2A type 2-A OS=Homo sapiens GN=HIST2H2AA3 PE=1 SV=3 - [H2A2A\_HUMAN]
- Histone H2A type 2-B OS=Homo sapiens GN=HIST2H2AB PE=1 SV=3 - [H2A2B\_HUMAN]
- Histone H2A type 2-C OS=Homo sapiens GN=HIST2H2AC PE=1 SV=4 - [H2A2C\_HUMAN]
- Histone H2A type 3 OS=Homo sapiens GN=HIST3H2A PE=1 SV=3 - [H2A3\_HUMAN]
- Histone H2A.J OS=Homo sapiens GN=H2AFJ PE=1 SV=1 - [H2AJ\_HUMAN]

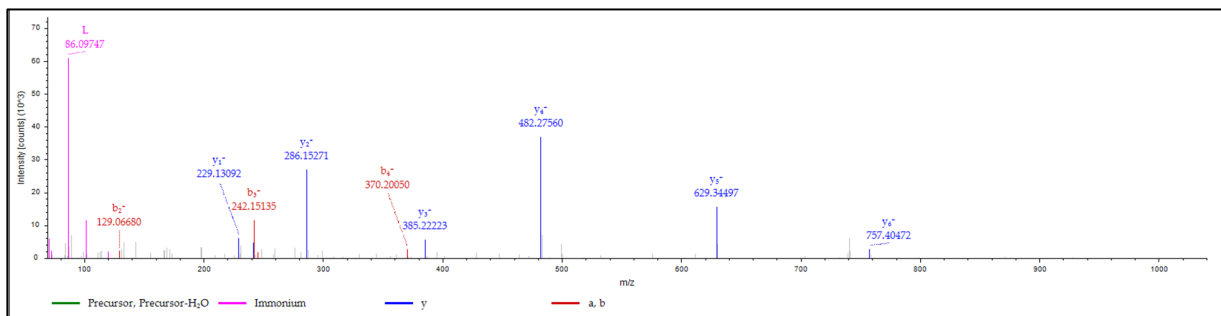

| #1 | Immonium  | a <sup>+</sup> | a <sup>2+</sup> | b <sup>+</sup> | b <sup>2+</sup> | Seq.    | y <sup>+</sup> | y <sup>2+</sup> | #2 |
|----|-----------|----------------|-----------------|----------------|-----------------|---------|----------------|-----------------|----|
| 1  | 44.04948  | 44.04948       | 22.52838        | 72.04440       | 36.52584        | A       |                |                 | 9  |
| 2  | 30.03383  | 101.07095      | 51.03911        | 129.06587      | 65.03657        | G       | 927.50473      | 464.25600       | 8  |
| 3  | 86.09643  | 214.15502      | 107.58115       | 242.14994      | 121.57861       | L       | 870.48326      | 435.74527       | 7  |
| 4  | 101.07094 | 342.21360      | 171.61044       | 370.20852      | 185.60790       | Q       | 757.39919      | 379.20323       | 6  |
| 5  | 120.08078 | 489.28202      | 245.14465       | 517.27694      | 259.14211       | F       | 629.34061      | 315.17394       | 5  |
| 6  | 70.06513  | 586.33479      | 293.67103       | 614.32971      | 307.66849       | P       | 482.27219      | 241.63973       | 4  |
| 7  | 72.08078  | 685.40321      | 343.20524       | 713.39813      | 357.20270       | V       | 385.21942      | 193.11335       | 3  |
| 8  | 30.03383  | 742.42468      | 371.71598       | 770.41960      | 385.71344       | G       | 286.15100      | 143.57914       | 2  |
| 9  |           |                |                 |                |                 | R-MG-H1 | 229.12953      | 115.06840       | 1  |

Sequence: DNIQGITKPAIRR, R12-MG-H1 (54.01057 Da)

Charge: +3, Monoisotopic m/z: 512.63013 Da (+3.51 mmu/+6.84 ppm), MH+: 1535.87583 Da, RT: 9.09 min,

Identified with: Sequest HT (v1.3); XCorr:3.79, Ions matched by search engine: 0/0

Fragment match tolerance used for search: 0.02 Da

Fragments used for search: a; a-H<sub>2</sub>O; a-NH<sub>3</sub>; b; b-H<sub>2</sub>O; b-NH<sub>3</sub>; y; y-H<sub>2</sub>O; y-NH<sub>3</sub>

Protein references (1):

- Histone H4 OS=Homo sapiens GN=HIST1H4A PE=1 SV=2 - [H4\_HUMAN]

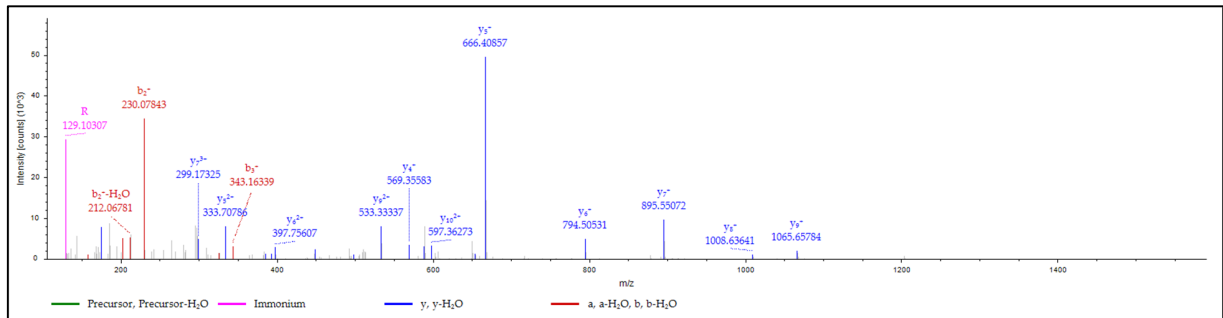

| #1 | Immonium  | a <sup>+</sup> | a <sup>2+</sup> | a <sup>3+</sup> | b <sup>+</sup> | b <sup>2+</sup> | b <sup>3+</sup> | Seq.    | y <sup>+</sup> | y <sup>2+</sup> | y <sup>3+</sup> | #2 |
|----|-----------|----------------|-----------------|-----------------|----------------|-----------------|-----------------|---------|----------------|-----------------|-----------------|----|
| 1  | 88.03931  | 88.03931       | 44.52329        | 30.01796        | 116.03423      | 58.52075        | 39.34959        | D       |                |                 |                 | 13 |
| 2  | 87.05529  | 202.08224      | 101.54476       | 68.03227        | 230.07716      | 115.54222       | 77.36390        | N       | 1420.83838     | 710.92283       | 474.28431       | 12 |
| 3  | 86.09643  | 315.16631      | 158.08679       | 105.72696       | 343.16123      | 172.08425       | 115.05859       | I       | 1306.79545     | 653.90136       | 436.27000       | 11 |
| 4  | 101.07094 | 443.22489      | 222.11608       | 148.41315       | 471.21981      | 236.11354       | 157.74479       | Q       | 1193.71138     | 597.35933       | 398.57531       | 10 |
| 5  | 30.03383  | 500.24636      | 250.62682       | 167.42031       | 528.24128      | 264.62428       | 176.75194       | G       | 1065.65280     | 533.33004       | 355.88912       | 9  |
| 6  | 86.09643  | 613.33043      | 307.16885       | 205.11500       | 641.32535      | 321.16631       | 214.44663       | I       | 1008.63133     | 504.81930       | 336.88196       | 8  |
| 7  | 74.06004  | 714.37811      | 357.69269       | 238.79756       | 742.37303      | 371.69015       | 248.12919       | T       | 895.54726      | 448.27727       | 299.18727       | 7  |
| 8  | 101.10733 | 842.47308      | 421.74018       | 281.49588       | 870.46800      | 435.73764       | 290.82752       | K       | 794.49958      | 397.75343       | 265.50471       | 6  |
| 9  | 70.06513  | 939.52585      | 470.26656       | 313.84680       | 967.52077      | 484.26402       | 323.17844       | P       | 666.40461      | 333.70594       | 222.80639       | 5  |
| 10 | 44.04948  | 1010.56297     | 505.78512       | 337.52584       | 1038.55789     | 519.78258       | 346.85748       | A       | 569.35184      | 285.17956       | 190.45546       | 4  |
| 11 | 86.09643  | 1123.64704     | 562.32716       | 375.22053       | 1151.64196     | 576.32462       | 384.55217       | I       | 498.31472      | 249.66100       | 166.77642       | 3  |
| 12 | 129.11348 | 1333.75873     | 667.38300       | 445.25776       | 1361.75364     | 681.38046       | 454.58940       | R-MG-H1 | 385.23065      | 193.11896       | 129.08173       | 2  |
| 13 |           |                |                 |                 |                |                 |                 | R       | 175.11896      | 88.06312        | 59.04450        | 1  |

Sequence: RVTIMPK, R1-MG-H1 (54.01057 Da), M5-Oxidation (15.99492 Da)  
Charge: +2, Monoisotopic m/z: 457.76288 Da (+2.82 mmu/+6.16 ppm), MH+: 914.51848 Da, RT: 5.78 min,  
Identified with: Sequest HT (v1.3); XCorr:1.98, Ions matched by search engine: 0/0  
Fragment match tolerance used for search: 0.02 Da  
Fragments used for search: a; a-H<sub>2</sub>O; a-NH<sub>3</sub>; b; b-H<sub>2</sub>O; b-NH<sub>3</sub>; y; y-H<sub>2</sub>O; y-NH<sub>3</sub>

Protein references (5):

- Histone H3.1t OS=Homo sapiens GN=HIST3H3 PE=1 SV=3 - [H31T\_HUMAN]
- Histone H3.1 OS=Homo sapiens GN=HIST1H3A PE=1 SV=2 - [H31\_HUMAN]
- Histone H3.2 OS=Homo sapiens GN=HIST2H3A PE=1 SV=3 - [H32\_HUMAN]
- Histone H3.3 OS=Homo sapiens GN=H3F3A PE=1 SV=2 - [H33\_HUMAN]
- Histone H3.3C OS=Homo sapiens GN=H3F3C PE=1 SV=3 - [H3C\_HUMAN]

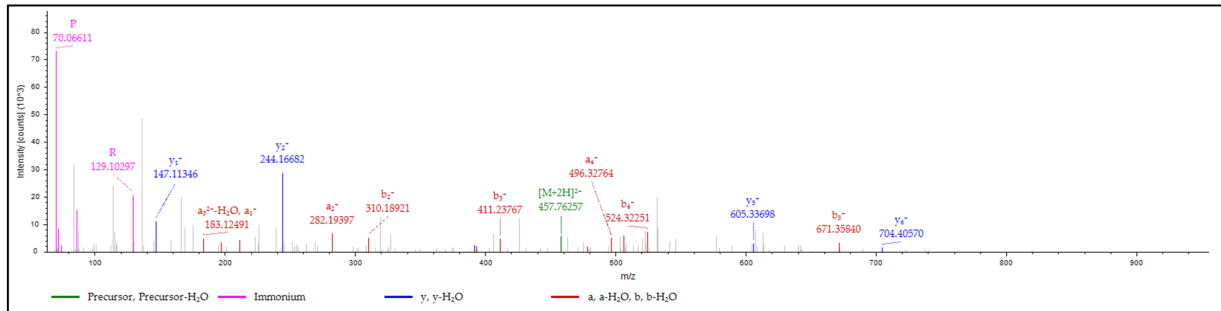

| #1 | Immonium  | a <sup>+</sup> | a <sup>2+</sup> | b <sup>+</sup> | b <sup>2+</sup> | Seq.        | y <sup>+</sup> | y <sup>2+</sup> | #2 |
|----|-----------|----------------|-----------------|----------------|-----------------|-------------|----------------|-----------------|----|
| 1  | 129.11348 | 183.12405      | 92.06566        | 211.11896      | 106.06312       | R-MG-H1     |                |                 | 7  |
| 2  | 72.08078  | 282.19247      | 141.59987       | 310.18738      | 155.59733       | V           | 704.40117      | 352.70422       | 6  |
| 3  | 74.06004  | 383.24015      | 192.12371       | 411.23506      | 206.12117       | T           | 605.33275      | 303.17001       | 5  |
| 4  | 86.09643  | 496.32422      | 248.66575       | 524.31913      | 262.66320       | I           | 504.28507      | 252.64617       | 4  |
| 5  | 104.05286 | 643.35963      | 322.18345       | 671.35455      | 336.18091       | M-Oxidation | 391.20100      | 196.10414       | 3  |
| 6  | 70.06513  | 740.41240      | 370.70984       | 768.40732      | 384.70730       | P           | 244.16558      | 122.58643       | 2  |
| 7  |           |                |                 |                |                 | K           | 147.11281      | 74.06004        | 1  |

Sequence: AGLQFPVGR, R9-MG-H1 (54.01057 Da)

Charge: +2, Monoisotopic m/z: 499.77725 Da (+2.69 mmu/+5.39 ppm), MH+: 998.54723 Da, RT: 14.53 min,

Identified with: Sequest HT (v1.3); XCorr:2.19, Ions matched by search engine: 0/0

Fragment match tolerance used for search: 0.02 Da

Fragments used for search: a; a-NH<sub>3</sub>; b; b-NH<sub>3</sub>; y; y-NH<sub>3</sub>

Protein references (15):

- Histone H2A type 1-A OS=Homo sapiens GN=HIST1H2AA PE=1 SV=3 - [H2A1A\_HUMAN]
- Histone H2A type 1-B/E OS=Homo sapiens GN=HIST1H2AB PE=1 SV=2 - [H2A1B\_HUMAN]
- Histone H2A type 1-C OS=Homo sapiens GN=HIST1H2AC PE=1 SV=3 - [H2A1C\_HUMAN]
- Histone H2A type 1-D OS=Homo sapiens GN=HIST1H2AD PE=1 SV=2 - [H2A1D\_HUMAN]
- Histone H2A type 1-H OS=Homo sapiens GN=HIST1H2AH PE=1 SV=3 - [H2A1H\_HUMAN]
- Histone H2A type 1-J OS=Homo sapiens GN=HIST1H2AJ PE=1 SV=3 - [H2A1J\_HUMAN]
- Histone H2A type 1 OS=Homo sapiens GN=HIST1H2AG PE=1 SV=2 - [H2A1\_HUMAN]
- Histone H2A type 2-A OS=Homo sapiens GN=HIST2H2AA3 PE=1 SV=3 - [H2A2A\_HUMAN]
- Histone H2A type 2-B OS=Homo sapiens GN=HIST2H2AB PE=1 SV=3 - [H2A2B\_HUMAN]
- Histone H2A type 2-C OS=Homo sapiens GN=HIST2H2AC PE=1 SV=4 - [H2A2C\_HUMAN]
- Histone H2A type 3 OS=Homo sapiens GN=HIST3H2A PE=1 SV=3 - [H2A3\_HUMAN]
- Histone H2A.J OS=Homo sapiens GN=H2AFJ PE=1 SV=1 - [H2AJ\_HUMAN]
- Histone H2A.V OS=Homo sapiens GN=H2AFV PE=1 SV=3 - [H2AV\_HUMAN]
- Histone H2AX OS=Homo sapiens GN=H2AFX PE=1 SV=2 - [H2AX\_HUMAN]
- Histone H2A.Z OS=Homo sapiens GN=H2AFZ PE=1 SV=2 - [H2AZ\_HUMAN]

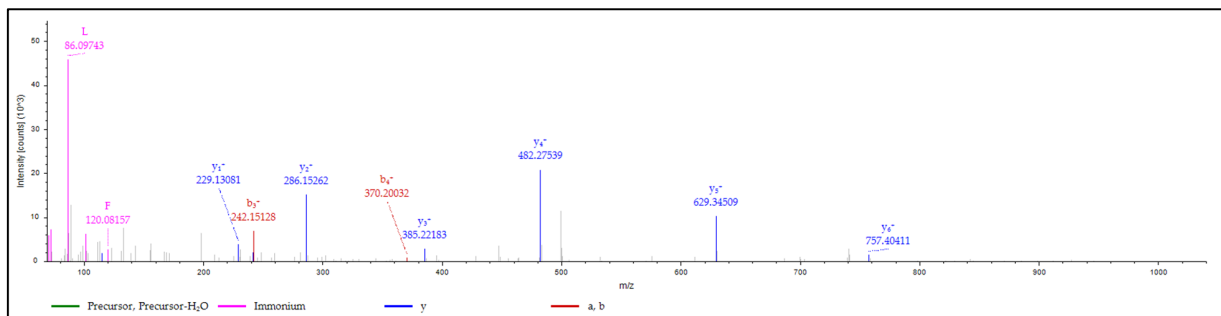

| #1 | Immonium  | a <sup>+</sup> | a <sup>2+</sup> | b <sup>+</sup> | b <sup>2+</sup> | Seq.    | y <sup>+</sup> | y <sup>2+</sup> | #2 |
|----|-----------|----------------|-----------------|----------------|-----------------|---------|----------------|-----------------|----|
| 1  | 44.04948  | 44.04948       | 22.52838        | 72.04440       | 36.52584        | A       |                |                 | 9  |
| 2  | 30.03383  | 101.07095      | 51.03911        | 129.06587      | 65.03657        | G       | 927.50473      | 464.25600       | 8  |
| 3  | 86.09643  | 214.15502      | 107.58115       | 242.14994      | 121.57861       | L       | 870.48326      | 435.74527       | 7  |
| 4  | 101.07094 | 342.21360      | 171.61044       | 370.20852      | 185.60790       | Q       | 757.39919      | 379.20323       | 6  |
| 5  | 120.08078 | 489.28202      | 245.14465       | 517.27694      | 259.14211       | F       | 629.34061      | 315.17394       | 5  |
| 6  | 70.06513  | 586.33479      | 293.67103       | 614.32971      | 307.66849       | P       | 482.27219      | 241.63973       | 4  |
| 7  | 72.08078  | 685.40321      | 343.20524       | 713.39813      | 357.20270       | V       | 385.21942      | 193.11335       | 3  |
| 8  | 30.03383  | 742.42468      | 371.71598       | 770.41960      | 385.71344       | G       | 286.15100      | 143.57914       | 2  |
| 9  |           |                |                 |                |                 | R-MG-H1 | 229.12953      | 115.06840       | 1  |

Sequence: RVTIMPK, R1-MG-H1 (54.01057 Da), M5-Oxidation (15.99492 Da)  
Charge: +2, Monoisotopic m/z: 457.76324 Da (+3.18 mmu/+6.96 ppm), MH+: 914.51921 Da, RT: 5.81 min,  
Identified with: Sequest HT (v1.3); XCorr:2.01, Ions matched by search engine: 0/0  
Fragment match tolerance used for search: 0.02 Da  
Fragments used for search: a; a-H<sub>2</sub>O; a-NH<sub>3</sub>; b; b-H<sub>2</sub>O; b-NH<sub>3</sub>; y; y-H<sub>2</sub>O; y-NH<sub>3</sub>  
Protein references (5):  
- Histone H3.1t OS=Homo sapiens GN=HIST3H3 PE=1 SV=3 - [H31T\_HUMAN]  
- Histone H3.1 OS=Homo sapiens GN=HIST1H3A PE=1 SV=2 - [H31\_HUMAN]  
- Histone H3.2 OS=Homo sapiens GN=HIST2H3A PE=1 SV=3 - [H32\_HUMAN]  
- Histone H3.3 OS=Homo sapiens GN=H3F3A PE=1 SV=2 - [H33\_HUMAN]  
- Histone H3.3C OS=Homo sapiens GN=H3F3C PE=1 SV=3 - [H3C\_HUMAN]

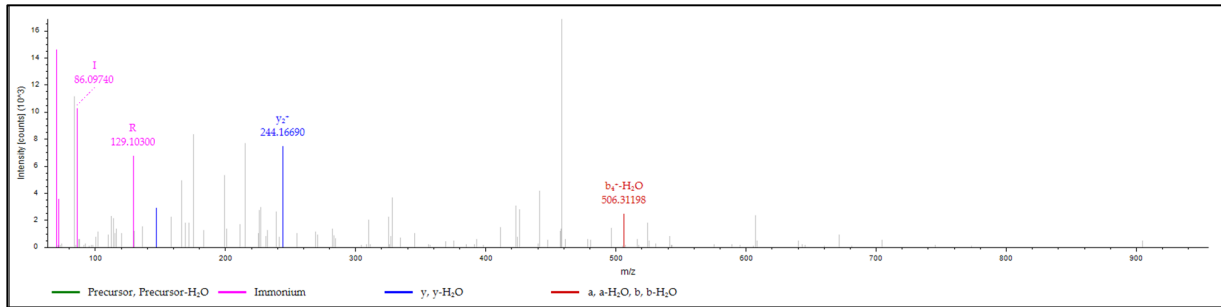

| #1 | Immonium  | a <sup>+</sup> | a <sup>2+</sup> | b <sup>+</sup> | b <sup>2+</sup> | Seq.        | y <sup>+</sup> | y <sup>2+</sup> | #2 |
|----|-----------|----------------|-----------------|----------------|-----------------|-------------|----------------|-----------------|----|
| 1  | 129.11348 | 183.12405      | 92.06566        | 211.11896      | 106.06312       | R-MG-H1     |                |                 | 7  |
| 2  | 72.08078  | 282.19247      | 141.59987       | 310.18738      | 155.59733       | V           | 704.40117      | 352.70422       | 6  |
| 3  | 74.06004  | 383.24015      | 192.12371       | 411.23506      | 206.12117       | T           | 605.33275      | 303.17001       | 5  |
| 4  | 86.09643  | 496.32422      | 248.66575       | 524.31913      | 262.66320       | I           | 504.28507      | 252.64617       | 4  |
| 5  | 104.05286 | 643.35963      | 322.18345       | 671.35455      | 336.18091       | M-Oxidation | 391.20100      | 196.10414       | 3  |
| 6  | 70.06513  | 740.41240      | 370.70984       | 768.40732      | 384.70730       | P           | 244.16558      | 122.58643       | 2  |
| 7  |           |                |                 |                |                 | K           | 147.11281      | 74.06004        | 1  |

Sequence: KAGAAKPR, K1-MG-H1 (54.01057 Da),  
Charge: +2, Monoisotopic m/z: 426.75247 Da (+2.16 mmu/+1.23 ppm), MH+: 852.49767 Da, RT: 11.07 min,  
Identified with: Sequest HT (v1.3); XCorr:2.01, Ions matched by search engine: 0/0  
Fragment match tolerance used for search: 0.02 Da  
Fragments used for search: a; a-H<sub>2</sub>O; a-NH<sub>3</sub>; b; b-H<sub>2</sub>O; b-NH<sub>3</sub>; y; y-H<sub>2</sub>O; y-NH<sub>3</sub>

Protein references(1)

- Histone H1.3t OS=Homo sapiens GN= HIST1H1D PE=1 SV=3 - [H13\_HUMAN]

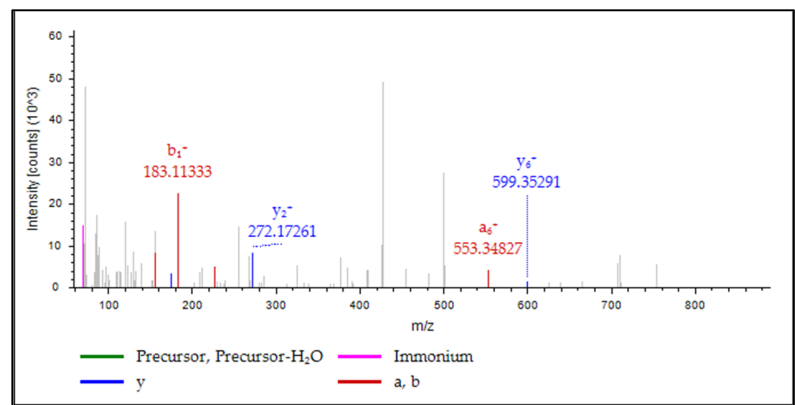

| #1 | Immonium  | a <sup>+</sup> | a <sup>2+</sup> | b <sup>+</sup> | b <sup>2+</sup> | Seq.    | y <sup>+</sup> | y <sup>2+</sup> | #2 |
|----|-----------|----------------|-----------------|----------------|-----------------|---------|----------------|-----------------|----|
| 1  | 101.10733 | 155.11790      | 78.06259        | 183.11281      | 92.06004        | K-MG-H1 |                |                 | 8  |
| 2  | 44.04948  | 226.15502      | 113.58115       | 254.14993      | 127.57860       | A       | 670.39953      | 335.70340       | 7  |
| 3  | 30.03383  | 283.17649      | 142.09188       | 311.17140      | 156.08934       | G       | 599.36241      | 300.18484       | 6  |
| 4  | 44.04948  | 354.21361      | 177.61044       | 382.20852      | 191.60790       | A       | 542.34094      | 271.67411       | 5  |
| 5  | 44.04948  | 425.25073      | 213.12900       | 453.24564      | 227.12646       | A       | 471.30382      | 236.15555       | 4  |
| 6  | 101.10733 | 553.34570      | 277.17649       | 581.34061      | 291.17394       | K       | 400.26670      | 200.63699       | 3  |
| 7  | 70.06513  | 650.39847      | 325.70287       | 678.39338      | 339.70033       | P       | 272.17173      | 136.58950       | 2  |
| 8  |           |                |                 |                |                 | R       | 175.11896      | 88.06312        | 1  |
